# Supplementary material for: Changes in Air Quality and Drivers for the Heavy PM2.5 Pollution on the North China Plain Pre- to Post-COVID-19
Source: MDPI journal article supplement (doi:10.3390/ijerph191912904), 2022-10-08
Supplement: s1 [file s1]

# Changes in Air Quality and Drivers for the Heavy PM<sub>2.5</sub> Pollution on the North China Plain Pre- to Post-COVID-19

Shuang Liu, Xingchuan Yang, Fuzhou Duan \*, and Wenji Zhao \*

College of Resource Environment and Tourism, Capital Normal University, Beijing 100048, China

\* Correspondence: 5482@cnu.edu.cn (F.D.); 4973@cnu.edu.cn (W.Z.)

**Table S1.** Locations of the ground-level monitoring sites.

| No. | Station code | Longitude | Latitude |
|-----|--------------|-----------|----------|
| 1   | 1001A        | 116.366   | 39.8673  |
| 2   | 1002A        | 116.17    | 40.2865  |
| 3   | 1003A        | 116.434   | 39.9522  |
| 4   | 1004A        | 116.434   | 39.8745  |
| 5   | 1005A        | 116.473   | 39.9716  |
| 6   | 1006A        | 116.361   | 39.9425  |
| 7   | 1007A        | 116.315   | 39.9934  |
| 8   | 1008A        | 116.72    | 40.1438  |
| 9   | 1009A        | 116.644   | 40.3937  |
| 10  | 1010A        | 116.23    | 40.1952  |
| 11  | 1011A        | 116.407   | 40.0031  |
| 12  | 1012A        | 116.225   | 39.9279  |
| 13  | 1316A        | 113.681   | 34.7545  |
| 14  | 1317A        | 113.641   | 34.7745  |
| 15  | 1318A        | 113.675   | 34.8019  |
| 16  | 1319A        | 113.564   | 34.802   |
| 17  | 1320A        | 113.727   | 34.7187  |
| 18  | 1321A        | 113.734   | 34.719   |
| 19  | 1322A        | 113.5991  | 34.7496  |
| 20  | 1323A        | 113.6356  | 34.7538  |
| 21  | 1324A        | 113.6113  | 34.9162  |
| 22  | 1811A        | 112.3628  | 34.6692  |
| 23  | 1812A        | 112.3939  | 34.6511  |
| 24  | 1813A        | 112.4333  | 34.67    |
| 25  | 1814A        | 112.4664  | 34.6869  |
| 26  | 1815A        | 112.4831  | 34.6869  |
| 27  | 1816A        | 112.3844  | 34.6231  |
| 28  | 1817A        | 112.4275  | 34.6258  |
| 29  | 1818A        | 114.483   | 36.061   |
| 30  | 1819A        | 114.32    | 36.086   |
| 31  | 1820A        | 114.358   | 36.087   |

|    |       |          |         |
|----|-------|----------|---------|
| 32 | 1821A | 114.3931 | 36.0883 |
| 33 | 1822A | 114.286  | 36.11   |
| 34 | 1823A | 114.3406 | 34.8022 |
| 35 | 1824A | 114.3389 | 34.7781 |
| 36 | 1825A | 114.3733 | 34.7975 |
| 37 | 1826A | 114.2886 | 34.7967 |
| 38 | 1827A | 113.261  | 35.235  |
| 39 | 1828A | 113.227  | 35.213  |
| 40 | 1829A | 113.2464 | 35.1764 |
| 41 | 1830A | 113.1992 | 35.259  |
| 42 | 1831A | 113.3064 | 33.7214 |
| 43 | 1832A | 113.322  | 33.721  |
| 44 | 1833A | 113.292  | 33.739  |
| 45 | 1834A | 113.182  | 33.737  |
| 46 | 1835A | 111.1928 | 34.7772 |
| 47 | 1836A | 111.158  | 34.794  |
| 48 | 1837A | 111.1858 | 34.7917 |
| 49 | 1838A | 111.1489 | 34.7997 |
| 50 | 2054A | 114.1044 | 32.1078 |
| 51 | 2064A | 114.0122 | 32.1403 |
| 52 | 2065A | 114.0681 | 32.1342 |
| 53 | 2066A | 114.0614 | 32.1383 |
| 54 | 2067A | 114.6613 | 33.6128 |
| 55 | 2068A | 114.6758 | 33.6347 |
| 56 | 2069A | 114.6546 | 33.5979 |
| 57 | 2070A | 114.6369 | 33.6406 |
| 58 | 2385A | 114.17   | 35.9019 |
| 59 | 2386A | 114.2956 | 35.7511 |
| 60 | 2387A | 114.2878 | 35.7306 |
| 61 | 2388A | 113.926  | 35.279  |
| 62 | 2389A | 113.836  | 35.31   |
| 63 | 2390A | 113.884  | 35.272  |
| 64 | 2391A | 113.883  | 35.303  |
| 65 | 2392A | 115.031  | 35.763  |
| 66 | 2393A | 114.9906 | 35.767  |
| 67 | 2394A | 115.0628 | 35.7672 |
| 68 | 2395A | 115.0772 | 35.767  |
| 69 | 2396A | 113.8331 | 34.0117 |
| 70 | 2397A | 113.8208 | 34.0314 |
| 71 | 2398A | 113.7906 | 33.9953 |
| 72 | 2399A | 114.056  | 33.567  |
| 73 | 2400A | 114.005  | 33.568  |
| 74 | 2401A | 114.014  | 33.581  |
| 75 | 2402A | 114.0322 | 33.5653 |

|    |       |          |          |
|----|-------|----------|----------|
| 76 | 2403A | 112.5192 | 32.9917  |
| 77 | 2404A | 112.5224 | 33.0122  |
| 78 | 2405A | 112.5003 | 32.9735  |
| 79 | 2406A | 112.5573 | 33.027   |
| 80 | 2407A | 112.55   | 32.9683  |
| 81 | 2408A | 115.6697 | 34.4286  |
| 82 | 2409A | 115.6558 | 34.429   |
| 83 | 2410A | 115.6386 | 34.407   |
| 84 | 2411A | 115.6578 | 34.402   |
| 85 | 2420A | 114.018  | 32.965   |
| 86 | 2421A | 114.0131 | 33.0069  |
| 87 | 2422A | 113.996  | 32.996   |
| 88 | 3021A | 115.0061 | 35.76806 |
| 89 | 3022A | 112.4433 | 34.6686  |
| 90 | 3039A | 111.19   | 34.7822  |
| 91 | 3054A | 113.5922 | 35.28385 |
| 92 | 3134A | 113.8172 | 34.0339  |
| 93 | 3141A | 114.3922 | 36.0878  |
| 94 | 3147A | 114.3442 | 34.8097  |
| 95 | 3169A | 113.2725 | 35.2067  |

No. 1–No. 12 are in Beijing, and the rest of the sites are in Henan.

**Table S2.** Statistical description of PM<sub>2.5</sub> and gaseous pollutants during 2017–2021 in Beijing and Henan.

| Pollutants                                    | Statistics | Beijing |       |       |       |       | Henan |       |       |       |       |
|-----------------------------------------------|------------|---------|-------|-------|-------|-------|-------|-------|-------|-------|-------|
|                                               |            | 2017    | 2018  | 2019  | 2020  | 2021  | 2017  | 2018  | 2019  | 2020  | 2021  |
| PM <sub>2.5</sub><br>( $\mu\text{g m}^{-3}$ ) | Mean       | 56      | 51    | 42    | 38    | 35    | 67    | 63    | 60    | 52    | 47    |
|                                               | SD         | 51      | 43    | 32    | 32    | 37    | 42    | 42    | 44    | 36    | 33    |
|                                               | Median     | 40      | 42    | 35    | 29    | 23    | 52    | 49    | 42    | 38    | 36    |
|                                               | Min        | 6       | 5     | 4     | 4     | 3     | 16    | 13    | 11    | 12    | 7     |
|                                               | Max        | 344     | 243   | 200   | 208   | 235   | 257   | 262   | 232   | 207   | 218   |
|                                               | Change (%) |         | –8.9  | –17.6 | –9.5  | –7.9  |       | –6.0  | –4.8  | –13.3 | –9.6  |
| NO <sub>2</sub><br>( $\mu\text{g m}^{-3}$ )   | Mean       | 44      | 40    | 36    | 28    | 29    | 41    | 37    | 35    | 30    | 27    |
|                                               | SD         | 20      | 19    | 17    | 15    | 14    | 15    | 14    | 14    | 13    | 13    |
|                                               | Median     | 39      | 36    | 32    | 24    | 25    | 37    | 35    | 32    | 28    | 24    |
|                                               | Min        | 11      | 7     | 8     | 4     | 4     | 17    | 16    | 12    | 10    | 8     |
|                                               | Max        | 146     | 102   | 97    | 94    | 83    | 84    | 84    | 76    | 70    | 70    |
|                                               | Change (%) |         | –9.1  | –10.0 | –22.2 | 3.6   |       | –9.8  | –5.4  | –14.3 | –10.0 |
| SO <sub>2</sub><br>( $\mu\text{g m}^{-3}$ )   | Mean       | 7       | 6     | 4     | 4     | 3     | 21    | 14    | 11    | 9     | 8     |
|                                               | SD         | 7       | 4     | 3     | 2     | 1     | 10    | 5     | 4     | 3     | 3     |
|                                               | Median     | 5       | 5     | 3     | 3     | 3     | 19    | 14    | 10    | 9     | 8     |
|                                               | Min        | 2       | 2     | 2     | 2     | 2     | 6     | 6     | 4     | 4     | 4     |
|                                               | Max        | 44      | 25    | 21    | 13    | 9     | 54    | 38    | 26    | 17    | 21    |
|                                               | Change (%) |         | –14.3 | –33.3 | 0.0   | –25.0 |       | –33.3 | –21.4 | –18.2 | –11.1 |
| CO                                            | Mean       | 0.9     | 0.8   | 0.7   | 0.6   | 0.6   | 1.3   | 1.2   | 0.9   | 0.8   | 0.7   |

|                       |                             |     |       |       |       |       |     |      |       |       |       |
|-----------------------|-----------------------------|-----|-------|-------|-------|-------|-----|------|-------|-------|-------|
| (mg m <sup>-3</sup> ) | SD                          | 0.7 | 0.4   | 0.4   | 0.4   | 0.3   | 0.5 | 0.3  | 0.3   | 0.2   | 0.2   |
|                       | Median                      | 0.8 | 0.8   | 0.6   | 0.6   | 0.6   | 1.2 | 1.0  | 0.8   | 0.7   | 0.7   |
|                       | Min                         | 0.2 | 0.2   | 0.2   | 0.1   | 0.2   | 0.7 | 0.6  | 0.5   | 0.4   | 0.4   |
|                       | Max                         | 7.3 | 2.6   | 2.5   | 2.3   | 2.3   | 4.6 | 2.8  | 2.1   | 2.1   | 2.0   |
|                       | Change (%)                  |     | -11.1 | -12.5 | -14.3 | 0.0   |     | -7.7 | -25.0 | -11.1 | -12.5 |
| MDA8 O <sub>3</sub>   | 90 <sup>th</sup> percentile | 195 | 198   | 196   | 176   | 158   | 182 | 178  | 182   | 168   | 161   |
| (µg m <sup>-3</sup> ) | Change (%)                  |     | 1.5   | -1.0  | -10.2 | -10.2 |     | -2.2 | 2.2   | -7.7  | -4.2  |
